# Supplementary material for: The chemorepellent, SLIT2, bolsters innate immunity against Staphylococcus aureus
Source: eLife. 2023 Sep 29;12:e87392. doi: 10.7554/eLife.87392 (PMC10541174; doi:10.7554/eLife.87392)
Supplement: Figure 1—source data 1. [file elife-87392-fig1-data1.xlsx]

## Sheet: Figure 1
	Fig. 1A				Extracellular S. aureus CFU							Fig. 1C	Phagocytic Efficiency				Fig. 1D	Phagocytic Index
	Time (h)	Vehicle			N-SLIT2			N-SLIT2ΔD2					Vehicle	N-SLIT2	N-SLIT2ΔD2			Vehicle	N-SLIT2	N-SLIT2ΔD2
	0	1	1	1	1	1	1	1	1	1			0.824468	0.843931	0.786585			1.25	1.36449	1.10256
	0.5	0.72	0.76	0.69	0.48	0.57	0.53	0.75	0.85	0.79			0.70625	0.7625	0.711765			1.44872	1.31183	1.59211
	1	0.62	0.54	0.58	0.31	0.28	0.25	0.52	0.63	0.57			0.824742	0.881579	0.912281			1.17647	0.950355	0.936937
	1.5	0.32	0.28	0.33	0.2	0.17	0.23	0.38	0.34	0.29
	2	0.23	0.29	0.32	0.19	0.14	0.21	0.31	0.24	0.28
	Fig. 1F			Maximum Isoluminol (S. aureus) x 105					Fig. 1H		Maximum Isoluminol (N-ROBO1) x 105
		Vehicle	N-SLIT2	N-SLIT2ΔD2	S. aureus	N-SLIT2 + S. aureus	N-SLIT2ΔD2 + S. aureus			Vehicle	N-ROBO1	S. aureus	N-SLIT2 + S. aureus	N-ROBO1 + N-SLIT2 + S. aureus
		2.56655	5.628	3.377	14.716	30.913	14.9131			1.05254	2.04132	9.46295	35.0001	12.557
		1.85656	2.2536	2.8684	18.557	44.3401	26.09			1.94215	1.6182	19.3969	49.71	16.968
		0.9981	1.5741	1.2354	15.3803	34.79	16.3651			1.51455	2.2522	10.6655	39.71	12.113
		1.5844	3.6972	3.6105	15.018	49.2561	11.6321			1.6602	2.56986	15.4575	49.7677	17.223
