# Supplementary material for: The chemorepellent, SLIT2, bolsters innate immunity against Staphylococcus aureus
Source: eLife. 2023 Sep 29;12:e87392. doi: 10.7554/eLife.87392 (PMC10541174; doi:10.7554/eLife.87392)
Supplement: Figure 2—source data 1. [file elife-87392-fig2-data1.xlsx]

## Sheet: Figure 2
	Fig. 2B	NCF1 (neutrophils)				Fig. 2D	p38 (neutrophils)				Fig. 2H	ROCK inhibitor - Y-27632
		Vehicle	N-SLIT2ΔD2	N-SLIT2			Vehicle	N-SLIT2	N-SLIT2ΔD2			Vehicle	N-SLIT2	Y-27 + N-SLIT2
		0.84	1.09	2.58			0.75	3.6	1.24			1	4.6	1.2
		0.9	1.15	3.86			1.1	2.58	1.36			1	3.3	0.9
		1.06	0.96	2.78			1.23	2.27	1.2			1	2.5	1.3
		1.2	1.29	2.38			0.92	3.15	0.95			1	2.9	1.08
	Fig. 2F			p38 MAPK inhibitors Maximum Isoluminol x 105
		Vehicle	S. aureus	N-SLIT2 + S. aureus	SB203580 + N-SLIT2 + S. aureus	p38MAPKi4 + N-SLIT2 + S. aureus
		1.5844	16.968	35.71	8.5844	5.85
		2.04132	8.113	32.71	7.04132	6.977
		2.54761	10.0468	47.6827	5.38962	4.38964
		3.05682	19.2467	33.8657	7.33864	8.24676
