# Supplementary material for: The chemorepellent, SLIT2, bolsters innate immunity against Staphylococcus aureus
Source: eLife. 2023 Sep 29;12:e87392. doi: 10.7554/eLife.87392 (PMC10541174; doi:10.7554/eLife.87392)
Supplement: Figure 3—source data 1. [file elife-87392-fig3-data1.xlsx]

## Sheet: Figure 3
	Fig. 3B						CD66b
		Vehicle	S. aureus	N-SLIT2	N-SLIT2ΔD2	N-SLIT2+ S. aureus	N-SLIT2ΔD2 + S. aureus	SB203580 + N-SLIT2+ S. aureus	p38MAPKi4 + N-SLIT2+ S. aureus	PD184161 + N-SLIT2 + S. aureus
		27.5	76.9	52.7	23.7	178	104	38	17.4	120
		39.7	72.5	38.2	36.5	121	46	50.5	47.7	193.7
		30.2	99.3	32.4	24	146	66.5	63.6	42.3	124
		19	84.3	51	16.9	211	114	37	15.7	142
		34.7	98.7	45.2	42.7	150	117	93.1	81.2	166
	Fig. 3C						CD18
		Vehicle	S. aureus	N-SLIT2	N-SLIT2ΔD2	N-SLIT2+ S. aureus	N-SLIT2ΔD2 + S. aureus	SB203580 + N-SLIT2+ S. aureus	p38MAPKi4 + N-SLIT2+ S. aureus	PD184161 + N-SLIT2 + S. aureus
		359	1278	693	272	2030	1091	968	830	2078
		840	1113	867	881	2135	1176	994	665	2549
		664	1448	769	656	2663	1442	892	812	2231
		364	1016	650	302	2799	1569	802	966	2163
		540	1401	629	586	1864	1024	621	1112	2933
	Fig. 3D						Primed neutrophils
		Vehicle	S. aureus	N-SLIT2	N-SLIT2ΔD2	N-SLIT2+ S. aureus	N-SLIT2ΔD2 + S. aureus	SB203580 + N-SLIT2+ S. aureus	p38MAPKi4 + N-SLIT2+ S. aureus	PD184161 + N-SLIT2 + S. aureus
		1	7.94444	2.61111	0.907407	18.7037	5.24074	1.7037	0.925926	16.463
		1	6.4	1.98333	1.5	19.3333	3.76667	1.96667	1.28333	17.2333
		1	5.78	2.88	1.14	12.48	5.18	3.16	1.86	10.46
		1	7.28723	0.776596	0.425532	10.8511	2.73404	1.75532	1.1383	15.0319
		1	5.66667	1.94872	2.28205	23.8462	7.84615	3.15385	3.74359	22.641
	Fig. 3E						LL-37
		Vehicle	S. aureus	N-SLIT2	N-SLIT2+ S. aureus	SB203580 + N-SLIT2+ S. aureus	p38MAPKi4 + N-SLIT2+ S. aureus	PD184161 + N-SLIT2 + S. aureus
		1	3.2	2.1	8.7	2.1	1.85	8.1
		1	3.3	1.6	6.75	1.8	2.21	6.8
		1	2.5	1.2	7.5	1.14	1.34	7.2
		1	2.8	1.41	8.2	1.56	2.25	7.7
