# Supplementary material for: The chemorepellent, SLIT2, bolsters innate immunity against Staphylococcus aureus
Source: eLife. 2023 Sep 29;12:e87392. doi: 10.7554/eLife.87392 (PMC10541174; doi:10.7554/eLife.87392)
Supplement: Figure 4—source data 1. [file elife-87392-fig4-data1.xlsx]

## Sheet: Figure 4
	Fig. 4A				SLIT2 ELISA
		Mock infection	S.aureus 0.5 d	S. aureus 1d	S. aureus 2d	S. aureus 3d	S. aureus 5d	S. aureus 7d
		264.448	155.535	228.536	471.497	1409.62	244.414	375.09
		323.682	184.832	161.422	393.963	1150.71	472.083	224.51
		368.767	116.455	240.527	474.776	1280.68	359.976	208.565
		241.122	244.75	176.031	381.612	1391.95	652.585	371.44
		233.704	189.25	222.328	481.744	1468.35	407.499	290.115
		375.362	161.49	323.134	503.04	1026.67	753.883	238.11
	Fig. 4D			Histology lesion score
		Mock infection	Ctr IgG	N-ROBO1	S. aureus	S. aureus + Ctr IgG	S. aureus + N-ROBO1
		1	1	2	2	2	3
		0	0	1	3	2	4
		0	1	2	2	3	3
		1	1	1	2	1	4
		0	0	2	1	2	3
		0	1	1	3	2	4
