# Supplementary material for: The chemorepellent, SLIT2, bolsters innate immunity against Staphylococcus aureus
Source: eLife. 2023 Sep 29;12:e87392. doi: 10.7554/eLife.87392 (PMC10541174; doi:10.7554/eLife.87392)
Supplement: Figure 5—source data 1. [file elife-87392-fig5-data1.xlsx]

## Sheet: Figure 5
	Fig. 5A				SLIT2 mRNA (S. aureus)							Fig. 5B				SLIT2 protein (secreted) S. aureus
		Time	Vehicle				S. aureus (MOI 1)						Time	Vehicle				S. aureus (MOI 1)
		6 h	1	1	1	1	0.88	1.06	0.94	0.85			12 h	441	363	604	517	84	129	73	107
		12 h	1	1	1	1	0.43	0.55	0.7	0.61			48 h	847	970	1039	1243	1462	1644	2169	1854
		24 h	1	1	1	1	1.05	1.3	0.74	1.83
		48 h	1	1	1	1	7.6	7.25	6.08	9.44
	Fig. 5C				SLIT2 mRNA (Hypoxia)							Fig. 5D				SLIT2 protein (secreted) Hypoxia
		Time	Normoxia				Hypoxia (1% O2)						Time	Normoxia				Hypoxia (1% O2)
		6 h	1	1	1	1	0.92	0.94	0.85	0.75			12 h	837	1052	957	1047	368	683	244	135
		12 h	1	1	1	1	0.39	0.46	0.68	0.62			48 h	1352	1175	1862	1600	2389	2486	1944	2956
		24 h	1	1	1	1	1.2	0.9	1.15	0.8
		48 h	1	1	1	1	9.49	8.8	11.22	9.35
